# Supplementary material for: B7-H3 Suppresses Antitumor Immunity via the CCL2–CCR2–M2 Macrophage Axis and Contributes to Ovarian Cancer Progression
Source: Oxford University Press journal article supplement (doi:10.1158/2326-6066.cir-21-0407), 2021-11-19
Supplement: cir-21-0407_supps2.docx [file cir-21-0407_supps2.docx]

**Supplementary Table S2. Materials used for immunostaining, flow cytometry, immunoblotting**

| Immunohistochemistry and immunofluorescence | SOURCE | IDENTIFIER |
| --- | --- | --- |
| Goat anti-Human B7-H3, 1:200 dilution | R&D Systems | Cat# AF1027; RRID: AB_354546 |
| Mouse anti-mouse/human CD206, 1:10000 dilution | Proteintech | Cat# 60143-1-Ig; RRID: AB_2144924 |
| Mouse anti-human CD8, 1:100 dilution | Nichirei Biosciences | Cat# 413201 |
| Rabbit anti-human IFN-γ, 1:100 dilution | R&D Systems | Cat# MAB2853 |
| Rabbit IgG (clone: EPR25A) | Abcam | Cat# ab172730; RRID: AB_2687931 |
| Goat anti-mouse IgG (Alexa Fluor 647), 1:500 dilution | Abcam | Cat# ab150115; RRID:AB_2687948 |
| Goat anti-rabbit IgG (Alexa Fluor 488) 1:500 dilution | Abcam | Cat# ab150077; RRID:AB_2630356 |
| ProLong Gold Antifade Mountant with DAPI | Invitrogen | Cat# p36935 |
| Rabbit anti-Mouse/Human CD276 (clone: EPNCIR122), 1:500 dilution | Abcam | Cat# ab134161; RRID: AB_2687929 |
| Rabbit anti-Human CD276 (clone: SP206), 1:100 dilution | Abcam | Cat# ab227670 |
| Mouse anti-Mouse/Human αSMA (clone: 1A4), 1:100 dilution | Thermo Fisher Scientific | Cat# 14-9760-82; RRID: AB_2572996 |
| Rat anti-mouse CD8, 1:300 dilution | Abcam | Cat# 22378; RRID:AB_447033 |
| Histofine SAB-PO(G) kit | Nichirei Biosciences | Cat# 424012 |
| Histofine SAB-PO(M) kit | Nichirei Biosciences | Cat# 424022 |
| Histofine SAB-PO(R) kit | Nichirei Biosciences | Cat# 424032 |
|  |  |  |
| Flow cytometry | **SOURCE** | **IDENTIFIER** |
| Rabbit Anti-Mouse/Human CD276 (clone: EPNCIR122), 1:1000 dilution | Abcam | Cat# ab134161; RRID: AB_2687929 |
| Rabbit IgG (clone: EPR25A), 1:1000 dilution | Abcam | Cat# ab172730; RRID: AB_2687931 |
| Goat Anti-Rabbit IgG H&L (Alexa Fluor 647), 1:2000 dilution | Abcam | Cat# ab150079; RRID:AB_2722623 |
| APC Conjugation Kit | Abcam | Cat# ab201807 |
| Mouse Anti-Human CD274 (PD-L1) PE (clone: MIH2), 1:100 dilution | BioLegend | Cat# 393607; RRID: AB_2749924 |
| Mouse Anti-Human CD273 (PD-L2) APC (clone: MIH18), 1:100 dilution | BioLegend | Cat# 345507; RRID: AB_2162177 |
| Rat Anti-Mouse/Human CD11b Pacific Blue (clone: M1/70), 1:100 dilution | BioLegend | Cat# 101223; RRID: AB_755985 |
| Rat Anti-mouse CD86 FITC (clone: PO3.3), 1:10 dilution | Miltenyi Biotec | Cat# 130-102-506; RRID: AB_2660745 |
| Armenian hamster Anti-mouse CD80 FITC (clone: 16-10A1), 1:100 dilution | BioLegend | Cat# 104706; RRID: AB_313127 |
| Rat Anti-Mouse CD206 FITC (clone: C068C2), 1:100 dilution | BioLegend | Cat# 141704; RRID: AB_10901166 |
| Rat Anti-Mouse CD45 FITC (clone: 30-F11), 1:100 dilution | BioLegend | Cat# 103108; RRID: AB_312973 |
| Rat Anti-Mouse IFNγ FITC (clone: XMG1.2), 1:100 dilution | BD Biosciences | Cat# 554411; RRID: AB_395375 |
| Rat Anti-Mouse CD4 PE (clone: RM4-5), 1:100 dilution | BioLegend | Cat# 100512; RRID: AB_312715 |
| Rat Anti-Mouse F4/80 PE (clone: BM8), 1:100 dilution | BioLegend | Cat# 123109; RRID: AB_893498 |
| Rat Anti-Mouse Ly6C PE (clone: HK1.4), 1:100 dilution | BioLegend | Cat# 128007; RRID: AB_1186133 |
| Rat Anti-Mouse CD206 PE (clone: C068C2), 1:100 dilution | BioLegend | Cat# 141705; RRID:AB_10896421 |
| Rat Anti-Mouse I-A/I-E PerCP (clone: M5/114.15.2), 1:100 dilution | BioLegend | Cat# 107625; RRID: AB_2191072 |
| Rat Anti-Mouse CD8a PE/Cy7 (clone: 53-6.7), 1:100 dilution | BioLegend | Cat# 100722; RRID: AB_312761 |
| Rat Anti-Mouse F4/80 PE/Cy7 (clone: BM8), 1:100 dilution | BioLegend | Cat# 123113; RRID: AB_893490 |
| Rat Anti-Mouse CD8a APC (clone: 53-6.7), 1:100 dilution | BioLegend | Cat# 100712; RRID: AB_312751 |
| Rat Anti-Mouse CD11c APC (clone: SA203G11), 1:10 dilution | Miltenyi Biotec | Cat# 130-102-493; RRID: AB_2660156 |
| Rat Anti-Mouse CD3 APC/Cy7 (clone: 17A2), 1:100 dilution | BioLegend | Cat# 100221; RRID: AB_2057374 |
| Rat Anti-Mouse CD45 APC/Cy7 (clone: 30-F11), 1:100 dilution | BioLegend | Cat# 103116; RRID: AB_312981 |
| Mouse Anti-Human CD45 FITC (clone: 2D1), 1:100 dilution | BioLegend | Cat# 368508; RRID: AB_2566368 |
| Mouse Anti-Human CD14 PE (clone: M5E2), 1:100 dilution | BioLegend | Cat# 301806; RRID: AB_314188 |
| Mouse Anti-Human CD206 APC (clone: 15-2), 1:100 dilution | BioLegend | Cat# 321110; RRID: AB_571885 |
| 7-aminoactinomycin D (7AAD), 1:20 dilution | BD Biosciences | Cat# 51-68981E |
| 4’,6-diamidino-2-phenylindole, dihydrochloride (DAPI), 1:100 dilution | Life Technologies | Cat# D1306 |
|  |  |  |
| Immunoblotting | **SOURCE** | **IDENTIFIER** |
| Rabbit anti STAT3 (phospho Y705), 1:2000 dilution | Abcam | Cat# ab76315; RRID: AB_1658549 |
| Rabbit anti NF-κB p65 (phospho S536), 1:500 dilution | Abcam | Cat# ab28856; RRID: AB_776755 |
| Mouse anti-TBP, 1:5000 dilution | Proteintech | Cat# 66166-1-Ig; RRID: AB_2881562 |
| Anti-rabbit IgG, HRP-linked Antibody, 1:3000 dilution | Cell Signaling Technology | Cat# 7074; RRID: AB_2099233 |
| Anti-mouse IgG, HRP-linked Antibody, 1:3000 dilution | Cell Signaling Technology | Cat# 7076; RRID: AB_330924 |
