# Supplementary material for: B7-H3 Suppresses Antitumor Immunity via the CCL2–CCR2–M2 Macrophage Axis and Contributes to Ovarian Cancer Progression
Source: Oxford University Press journal article supplement (doi:10.1158/2326-6066.cir-21-0407), 2021-11-19
Supplement: cir-21-0407_supps3-5.xlsx [file cir-21-0407_supps3-5.xlsx]

## Sheet: Sup Table 3 HM-1 cell
Supplementary Table S3.: Differentially expressed genes comparing HM-1 control cells to HM-1 B7-H3 KO cells
gene	baseMean	log2FoldChange	lfcSE	stat	pvalue	padj
Glipr2	2411.04	4.72847	0.217016	21.7886	2.97606e-105	5.75005e-101
Tnc	18855.3	5.9062	0.299199	19.74	9.77321e-87	8.00615e-83
Ucp2	4938.34	5.86565	0.297328	19.7279	1.24313e-86	8.00615e-83
Anpep	1672.13	7.72553	0.393947	19.6106	1.25607e-85	6.06715e-82
Padi4	1556.11	9.04678	0.479188	18.8794	1.68472e-79	6.5101e-76
Pogk	1120.97	7.24266	0.384456	18.8387	3.63585e-79	1.1708e-75
Ivns1abp	5584.08	9.49677	0.542539	17.5043	1.3282e-68	2.85135e-65
Ripk3	1395.29	2.96188	0.173479	17.0734	2.34051e-65	4.5221e-62
Nrn1	1093.83	5.44623	0.329922	16.5077	3.23202e-61	5.20383e-58
Micu2	1277.61	5.86796	0.363756	16.1316	1.53019e-58	2.11177e-55
Epas1	1683.78	6.40985	0.437135	14.6633	1.10704e-48	1.12574e-45
Vcan	2634.07	5.77579	0.397545	14.5286	7.98139e-48	7.71042e-45
Arhgap30	1521.01	9.5446	0.660884	14.4422	2.80899e-47	2.46693e-44
Vdr	2398.86	2.23386	0.156773	14.249	4.54844e-46	3.51522e-43
Igf2r	4256.93	3.31876	0.237009	14.0026	1.50172e-44	1.11595e-41
Gem	2636.72	10.262	0.744433	13.785	3.13783e-43	2.24541e-40
Slit2	1262.84	5.90965	0.42976	13.751	5.02058e-43	3.46438e-40
Irf8	1168.35	3.76969	0.2745	13.7329	6.44759e-43	4.29565e-40
Bcam	3717.78	4.66986	0.350731	13.3146	1.90308e-40	1.18611e-37
Cxcl16	1027.59	3.9333	0.299252	13.1438	1.84749e-39	1.04986e-36
Col16a1	2570.14	3.7487	0.288678	12.9858	1.47359e-38	8.13463e-36
Trim44	3807.79	9.99098	0.783381	12.7537	2.97429e-37	1.52256e-34
Ptgs1	2453.47	6.099	0.484531	12.5874	2.47656e-36	1.19624e-33
Acap1	2266.41	4.7075	0.374912	12.5563	3.6726e-36	1.68948e-33
Ccl2	1338.89	7.25279	0.592674	12.2374	1.96231e-34	7.58275e-32
Ctsh	1551.96	3.89511	0.320086	12.169	4.54806e-34	1.723e-31
Ckap4	5534.55	14.4529	1.20528	11.9913	3.94551e-33	1.41169e-30
Ace	1900.48	6.60041	0.563554	11.7121	1.10505e-31	3.55844e-29
Mbp	1000.43	2.13828	0.183618	11.6453	2.4252e-31	7.55762e-29
Col5a3	5209.43	3.61279	0.31674	11.4062	3.89573e-30	1.17608e-27
Mmp13	10156.4	3.26	0.293213	11.1182	1.02328e-28	2.95086e-26
Tcn2	1351.24	2.75168	0.247569	11.1148	1.063e-28	3.02032e-26
Sod3	1529.02	3.46906	0.331326	10.4702	1.18343e-25	2.89432e-23
Cxcl3	7449.82	4.11199	0.394807	10.4152	2.11376e-25	4.98047e-23
Col8a1	2603.16	4.81524	0.467266	10.3052	6.67874e-25	1.50046e-22
Olfml2b	5570.19	2.06834	0.201611	10.259	1.07795e-24	2.39391e-22
Acp5	1188.05	6.40656	0.635037	10.0885	6.21206e-24	1.33359e-21
Pla2g7	1882.78	2.11009	0.214407	9.84153	7.45712e-23	1.50082e-20
Cadm1	4936.93	2.17434	0.224433	9.68815	3.38616e-22	6.60849e-20
Spns2	2239.81	2.19201	0.23036	9.5156	1.80665e-21	3.29305e-19
Spint2	1646.68	9.93593	1.13905	8.72302	2.70877e-18	3.79248e-16
Pbxip1	1291.33	2.2158	0.254771	8.69722	3.40105e-18	4.6604e-16
Igfbp6	1393.06	3.88019	0.480745	8.07121	6.9607e-16	7.47153e-14
Csrp2	1131.19	3.11577	0.392106	7.94624	1.92255e-15	1.97583e-13
Rundc3a	1915.76	2.50111	0.319142	7.83698	4.61522e-15	4.50357e-13
Dab2	7918.07	2.17653	0.278412	7.81768	5.38039e-15	5.22385e-13
Serinc5	2814.66	4.13343	0.532841	7.75734	8.67277e-15	8.21405e-13
Fzd1	1089.75	6.54691	0.854257	7.66386	1.80422e-14	1.6521e-12
Cyba	1639.09	8.87214	1.16058	7.6446	2.0959e-14	1.91013e-12
Tspan15	1044.27	8.97965	1.19818	7.49441	6.65947e-14	5.71856e-12
Atp1b1	4128.32	2.69583	0.36245	7.43778	1.02388e-13	8.71473e-12
Pcdh7	1515.1	4.67074	0.631061	7.4014	1.34757e-13	1.11267e-11
Aqp1	1326.98	4.9156	0.665207	7.38957	1.473e-13	1.20593e-11
Smim1	1257.3	5.42642	0.764217	7.10063	1.24194e-12	9.05489e-11
Stab1	1873.06	2.91567	0.467346	6.23879	4.40973e-10	2.27057e-08
Cd163	1429.51	4.12237	0.661119	6.23545	4.50494e-10	2.29657e-08
Arhgdib	1485.55	2.55757	0.414718	6.16702	6.95887e-10	3.45636e-08
Slc38a1	4175.33	3.10858	0.512423	6.06644	1.30778e-09	6.26987e-08
Ablim1	2334.12	2.2777	0.398558	5.71486	1.09795e-08	4.46601e-07
Ptpn13	1765.7	3.29528	0.596691	5.52258	3.34049e-08	1.26552e-06
Gm13230	1092.64	2.11542	0.406529	5.20361	1.95459e-07	6.20107e-06
Cxcl15	1135.77	2.59237	0.506077	5.12247	3.01552e-07	9.20424e-06
Mmp9	8938.81	2.49681	0.498084	5.01283	5.36358e-07	1.53298e-05
Tceal8	1382.54	6.17132	1.25834	4.90435	9.37373e-07	2.51314e-05
Dbn1	3993.54	2.02308	0.412607	4.90317	9.43011e-07	2.52004e-05
Lbp	2911.42	2.77806	0.57192	4.85744	1.18916e-06	3.07163e-05
Eva1b	2022.47	2.19937	0.458801	4.79373	1.63707e-06	4.06552e-05
Cfh	1592.65	4.31694	0.949251	4.54773	5.42276e-06	0.000120985
Eya4	1089.65	3.76171	0.855498	4.3971	1.09707e-05	0.000226458
Col6a1	11735.4	2.58121	0.588116	4.38895	1.13898e-05	0.000234607
Igfbp3	5952.43	4.82894	1.10536	4.36866	1.2501e-05	0.0002541
C1s1	4264.83	2.10179	0.483231	4.34945	1.36478e-05	0.000273821
Cdh2	2123.74	4.95805	1.29264	3.83561	0.000125255	0.00183615
Lsr	1533.36	4.67686	1.26428	3.69922	0.00021626	0.00292602
Fscn1	3708.9	4.08034	1.11581	3.65685	0.000255337	0.00337439
Adamts1	2977.07	2.88092	0.791634	3.6392	0.000273481	0.00357832
Cd74	12355.6	2.37877	0.664356	3.58056	0.000342855	0.00431832
Abcg2	2654.28	2.24238	0.635336	3.52944	0.000416447	0.00506686
Gata4	1676.88	-4.36458	1.28131	-3.40635	0.000658387	0.00734028
Rgs5	5300.54	-4.62379	1.30895	-3.53243	0.000411752	0.00501922
Notch3	2047.42	-3.12333	0.829644	-3.76467	0.00016677	0.0023248
Ptprf	2887.83	-5.02756	1.33357	-3.76999	0.000163253	0.00227906
Tfcp2l1	1194.62	-4.85119	1.24456	-3.89793	9.702e-05	0.00146333
Tns4	2393.57	-2.05128	0.505857	-4.05506	5.01215e-05	0.00082769
Clca3a1	2246.03	-2.70107	0.664793	-4.06302	4.84414e-05	0.000806147
Ptprz1	3290.32	-2.07709	0.462557	-4.49045	7.1073e-06	0.000153946
Zfp518b	1309.87	-2.36532	0.445958	-5.3039	1.13354e-07	3.81181e-06
Pgap1	1512.08	-2.21539	0.40497	-5.47051	4.48752e-08	1.65465e-06
Wnt5a	1764.33	-2.71011	0.374077	-7.2448	4.33094e-13	3.30743e-11
Bmp2	2613.48	-2.3454	0.132895	-17.6485	1.0456e-69	2.52526e-66

## Sheet: Sup Table 4 ID8 cell
Supplementary Table S4.: Differentially expressed genes comparing ID8 control cells to ID8 B7-H3 KO cells
gene	baseMean	log2FoldChange	lfcSE	stat	pvalue	padj
Ephb4	2586.34	3.99708	0.208999	19.1249	1.56803e-81	4.63801e-78
Fscn1	3708.9	7.78774	0.420388	18.5251	1.29487e-76	3.35127e-73
Glul	3572.71	2.23778	0.122129	18.3231	5.41338e-75	1.24538e-71
Chst1	3607.56	3.46553	0.193651	17.8958	1.27144e-71	2.3932e-68
Bnip3	3194.79	6.53481	0.382154	17.1	1.48484e-65	2.56196e-62
Pmp22	1241.26	3.27391	0.203597	16.0803	3.50476e-58	4.2686e-55
Pcyt1b	1300.27	3.82339	0.238932	16.002	1.23829e-57	1.42438e-54
Arhgef40	5251.54	4.31753	0.281518	15.3366	4.3523e-53	4.50571e-50
Lgals3bp	10989	4.58841	0.305215	15.0334	4.43791e-51	3.82862e-48
Deptor	3993.82	4.07222	0.281635	14.4592	2.1936e-47	1.62209e-44
Glipr1	1754.61	7.5824	0.527845	14.3648	8.60338e-47	6.14252e-44
Egr1	3094.4	2.30153	0.166826	13.796	2.69317e-43	1.64006e-40
Col5a2	11004.1	7.71593	0.574827	13.4231	4.43021e-41	2.54799e-38
Nptxr	5083.04	2.29706	0.171589	13.387	7.2049e-41	3.92572e-38
Dpysl3	2979.03	4.0915	0.307831	13.2914	2.59725e-40	1.37887e-37
C1qtnf6	3238.3	4.16312	0.316729	13.1441	1.83953e-39	8.85753e-37
Adgrl3	1530.98	4.09345	0.317665	12.8861	5.39133e-38	2.32557e-35
Plxnd1	8401.97	2.21559	0.172044	12.878	5.98351e-38	2.52834e-35
Ly6c1	2992.44	5.37704	0.433403	12.4066	2.40764e-35	8.59485e-33
Ly6e	48973.3	9.55127	0.781896	12.2155	2.56862e-34	8.86387e-32
Acta2	5343.46	8.62059	0.711089	12.1231	7.97167e-34	2.66215e-31
B4galnt1	1977.73	3.86194	0.325976	11.8473	2.22189e-32	6.76533e-30
Sema7a	5713.14	2.4709	0.208917	11.8272	2.82428e-32	8.47489e-30
Tead2	2196.1	4.71998	0.400896	11.7736	5.34118e-32	1.55759e-29
Gstm2	1820.1	2.75311	0.23486	11.7223	9.79281e-32	2.77754e-29
Kif21b	1390.13	3.14545	0.273267	11.5105	1.16756e-30	3.18083e-28
Car5b	2314.16	2.42607	0.21561	11.2522	2.26006e-29	5.77711e-27
Adgra2	4735.31	2.37781	0.212337	11.1983	4.15553e-29	1.03663e-26
Fam20a	1137.21	2.41706	0.217821	11.0965	1.30403e-28	3.06818e-26
Sdc3	2084.24	5.75387	0.526151	10.9358	7.77366e-28	1.71227e-25
Ccl9	2355.69	3.33137	0.307392	10.8375	2.28554e-27	4.92938e-25
Ptpre	1573.47	2.60778	0.244811	10.6522	1.70256e-26	3.49025e-24
Gpm6b	1760.18	4.77584	0.457785	10.4325	1.76223e-25	3.28711e-23
Grem1	2793.22	4.65538	0.450369	10.3368	4.80293e-25	8.64737e-23
Gstm1	4884.59	2.90221	0.293469	9.88934	4.63049e-23	6.89743e-21
Emilin1	2006.24	3.84457	0.388931	9.88498	4.83688e-23	7.1534e-21
Slit2	1262.84	4.29379	0.435768	9.85338	6.62758e-23	9.73221e-21
Tfpi	1641.69	7.55727	0.771978	9.78949	1.2493e-22	1.78391e-20
Plxna3	1864.04	2.00924	0.206064	9.75054	1.83492e-22	2.56702e-20
Als2cl	1429.88	5.2439	0.544331	9.63366	5.76409e-22	7.74971e-20
Tnfrsf23	5478.71	2.03469	0.212714	9.56537	1.118e-21	1.45586e-19
Tap2	1354.89	3.78748	0.397305	9.53294	1.52887e-21	1.95402e-19
Ppic	3276.38	2.09522	0.223074	9.3925	5.85914e-21	7.26428e-19
S100a16	12779.9	4.24865	0.474957	8.94532	3.70874e-19	3.89794e-17
Masp1	2388.7	3.53118	0.394876	8.94249	3.80485e-19	3.97875e-17
Ifi203	3029.73	2.59318	0.295289	8.78183	1.60838e-18	1.60877e-16
Tnnt2	1715.06	2.31662	0.269238	8.60437	7.67339e-18	7.35545e-16
Adamts4	1751.57	2.04119	0.239968	8.50608	1.79907e-17	1.67039e-15
Fbn1	2733.63	4.96414	0.588571	8.43422	3.33408e-17	2.97552e-15
Tnc	18855.3	2.75791	0.334308	8.24961	1.58911e-16	1.31085e-14
Lgr6	2806.16	2.89856	0.356638	8.12744	4.38439e-16	3.51856e-14
Ifitm3	9598.52	2.27457	0.281224	8.0881	6.06023e-16	4.77874e-14
Vldlr	2986.15	2.01362	0.261087	7.71245	1.23425e-14	8.54687e-13
Rps6ka2	1739.78	2.59058	0.335956	7.71108	1.24761e-14	8.61057e-13
Pogk	1120.97	2.46171	0.320251	7.68682	1.50838e-14	1.03073e-12
Adamts2	1840.83	3.32668	0.455439	7.30433	2.78654e-13	1.67719e-11
Cmbl	1051.82	2.79374	0.386087	7.23604	4.6199e-13	2.733e-11
Aim2	2863.49	7.43514	1.031	7.21155	5.5317e-13	3.24459e-11
Mndal	2262.84	2.31167	0.32146	7.19115	6.42469e-13	3.70538e-11
Igfbp3	5952.43	8.92703	1.24283	7.18284	6.82757e-13	3.91592e-11
Ecm1	7830.79	2.37739	0.33365	7.1254	1.03777e-12	5.8708e-11
Blnk	1285.72	2.1855	0.309769	7.05526	1.72275e-12	9.38669e-11
Ccl2	1338.89	2.91495	0.423393	6.88473	5.78971e-12	2.87472e-10
Mgst2	1634.77	3.27526	0.477033	6.8659	6.60713e-12	3.23406e-10
Fcgrt	3559.37	2.44186	0.36022	6.7788	1.21176e-11	5.74132e-10
Eya2	1153.76	7.87331	1.19287	6.6003	4.10331e-11	1.80764e-09
Plpp3	2890.24	8.21113	1.24875	6.57547	4.84997e-11	2.12302e-09
Col5a1	11502.3	3.08667	0.475124	6.49655	8.21839e-11	3.48692e-09
Ddr2	4114.61	3.08907	0.477693	6.46664	1.00205e-10	4.19989e-09
Cxcl15	1135.77	4.65855	0.725039	6.42524	1.31663e-10	5.41266e-09
Fmn1	1105.58	2.25933	0.355341	6.35822	2.04103e-10	8.22168e-09
Lrrk2	3478.95	7.16313	1.13349	6.31955	2.62333e-10	1.04253e-08
Lbp	2911.42	4.06076	0.643883	6.30668	2.85089e-10	1.1222e-08
Ifi27	1860.11	2.03793	0.324576	6.27875	3.41305e-10	1.32638e-08
C1s1	4264.83	2.47117	0.400628	6.16824	6.90524e-10	2.58541e-08
Fmnl2	4209.46	3.42295	0.568799	6.01785	1.76748e-09	6.04887e-08
Pecam1	1669	2.36726	0.393718	6.01258	1.82595e-09	6.20793e-08
Htra3	3082.07	2.02445	0.339018	5.97149	2.35093e-09	7.81316e-08
Peg13	1108.12	2.4319	0.407342	5.97017	2.37002e-09	7.86399e-08
Itih2	1761.2	3.50933	0.60479	5.80256	6.53089e-09	2.03648e-07
Efnb1	4503.35	2.00044	0.348645	5.73776	9.59357e-09	2.89191e-07
Cfh	1592.65	3.47395	0.605457	5.73773	9.59546e-09	2.89191e-07
S100a4	12672.6	2.11084	0.376164	5.61149	2.00597e-08	5.68955e-07
Slpi	1824.11	3.34375	0.612662	5.45774	4.82227e-08	1.28832e-06
Glis3	2122.99	6.67685	1.23073	5.42513	5.79109e-08	1.52163e-06
Stra6	1024.37	2.38944	0.451143	5.29643	1.1809e-07	2.9282e-06
Ly6a	7571.41	5.41039	1.05351	5.13557	2.81291e-07	6.50014e-06
Ndrg2	1528.09	6.28217	1.22464	5.1298	2.90044e-07	6.65783e-06
Cd74	12355.6	4.21505	0.860853	4.89637	9.76222e-07	2.02532e-05
Cxcl3	7449.82	6.10343	1.26103	4.84003	1.29821e-06	2.63783e-05
Lsp1	1675.45	2.17372	0.462598	4.69894	2.61518e-06	4.96309e-05
Nrep	1374.94	3.17095	0.685905	4.62302	3.78188e-06	6.92341e-05
Col3a1	53411.1	3.08007	0.667828	4.61208	3.98667e-06	7.24071e-05
Coro2a	1403.13	5.54728	1.21259	4.57475	4.76784e-06	8.49554e-05
Tenm4	2986.06	5.4438	1.23533	4.40677	1.04926e-05	0.000171467
Myh10	1468.81	2.3435	0.546862	4.28536	1.82445e-05	0.000284025
Col1a2	28384.6	3.56245	0.832682	4.27829	1.88338e-05	0.000292758
Islr	1217	3.00626	0.721781	4.16505	3.1128e-05	0.000459705
Thbs1	12322.8	2.1045	0.522689	4.02629	5.66639e-05	0.000763819
Sorcs2	2310.48	4.97737	1.24515	3.99742	6.40377e-05	0.000847763
Fam78b	1011.61	4.82252	1.23597	3.9018	9.54794e-05	0.00120281
Pappa	2941.54	3.64921	0.940418	3.88041	0.00010428	0.00129754
Syt13	1317.78	2.60095	0.674604	3.85551	0.000115487	0.00140988
Serping1	1806.27	4.96807	1.31285	3.78419	0.000154212	0.00181007
Kcnab2	1231.89	4.63838	1.23876	3.74437	0.000180845	0.00208023
Timp3	3952.01	2.30635	0.634148	3.63693	0.000275906	0.0029676
Col6a3	6391.28	4.64255	1.32094	3.51459	0.000440434	0.00443966
Aldh1a2	1010.37	4.66171	1.39326	3.34589	0.000820194	0.00752086
Ogdhl	1920.81	4.2311	1.26545	3.34355	0.000827136	0.00756919
Pax9	1352.84	4.22885	1.27242	3.32347	0.000889036	0.0080558
Rbp4	1647.82	-3.90193	1.10381	-3.53498	0.000407812	0.00415983
Scn5a	1014.49	-5.04701	1.26717	-3.9829	6.80786e-05	0.000895532
Lama4	1010.1	-6.15317	1.2975	-4.74233	2.11269e-06	4.09966e-05
Plvap	7757.18	-2.27207	0.437799	-5.18975	2.10578e-07	4.9602e-06
Sash1	1030.98	-3.31941	0.547958	-6.05779	1.38003e-09	4.86771e-08
9330188P03Rik	1209.33	-2.1347	0.338196	-6.31202	2.75419e-10	1.09035e-08
Fer1l6	4458.59	-2.81434	0.425174	-6.61926	3.60991e-11	1.604e-09
Dock4	2403.97	-2.51785	0.373867	-6.73461	1.64371e-11	7.59667e-10
Mcam	2926.89	-2.02303	0.281944	-7.17529	7.21545e-13	4.12696e-11
Podxl	1245.49	-2.49949	0.343819	-7.26979	3.60047e-13	2.14217e-11
Tbc1d16	1684.92	-2.60327	0.357631	-7.27923	3.35741e-13	2.00332e-11
Mrc1	3821.81	-3.6628	0.476647	-7.6845	1.53595e-14	1.04611e-12
Flrt3	2072.9	-2.60543	0.295089	-8.82929	1.0534e-18	1.07974e-16
Jag2	3728.27	-2.34998	0.228406	-10.2886	7.93088e-25	1.3916e-22
Pros1	1166.41	-3.44252	0.324233	-10.6174	2.47258e-26	5.01909e-24
F2rl1	1475.39	-3.1203	0.289713	-10.7703	4.75362e-27	1.01468e-24
Spry4	3588.04	-2.19471	0.194193	-11.3017	1.28656e-29	3.41515e-27
Itgb4	5197.24	-2.09774	0.178468	-11.7542	6.7214e-32	1.93287e-29
Sh3bgrl2	3978.19	-2.39783	0.190453	-12.5901	2.39397e-36	9.01222e-34
Pdlim1	3125.47	-2.89567	0.220214	-13.1494	1.71578e-39	8.45839e-37
Slco2a1	6614.72	-2.52019	0.152946	-16.4776	5.31225e-61	7.33267e-58

## Sheet: Sup Table 5 HM-1 tumor
Supplementary Table S5.: Differentially expressed genes comparing HM-1 control tumors to HM-1 B7-H3 KO tumors
gene	baseMean	log2FoldChange	lfcSE	stat	pvalue	padj
Anxa8	6180.28	2.45435	0.167538	14.6495	1.35614e-48	4.67981e-45
Nrn1	1093.83	3.80244	0.31267	12.1612	5.00357e-34	6.09405e-31
Gem	2636.72	6.70191	0.553296	12.1127	9.04622e-34	1.04057e-30
Car5b	2314.16	2.25026	0.18902	11.9049	1.11629e-32	1.21646e-29
Igf2bp1	1785.35	2.54673	0.216548	11.7606	6.22886e-32	6.44842e-29
Cxcl3	7449.82	4.58645	0.397113	11.5495	7.42882e-31	6.99154e-28
Spns2	2239.81	2.57693	0.227827	11.3109	1.15855e-29	9.59512e-27
Pogk	1120.97	3.35127	0.30072	11.1441	7.64749e-29	6.09005e-26
Tpd52l1	1106.45	2.01188	0.183595	10.9583	6.06588e-28	4.65163e-25
Ltbp1	7405.33	2.12378	0.197967	10.7279	7.52687e-27	4.72254e-24
Itgb7	2970.81	2.57501	0.244226	10.5436	5.43981e-26	2.88798e-23
Cd109	4266.24	2.0093	0.19358	10.3797	3.06822e-25	1.51256e-22
Dusp14	1225.05	2.92796	0.2844	10.2952	7.40658e-25	3.56635e-22
Padi4	1556.11	3.26914	0.318816	10.254	1.13528e-24	5.22355e-22
Cadm1	4936.93	2.07817	0.224103	9.27328	1.80506e-20	4.73087e-18
Dusp1	1132.27	2.50899	0.270865	9.26289	1.98977e-20	5.08621e-18
Ctgf	8082.1	2.15005	0.232485	9.24812	2.28484e-20	5.63186e-18
Acap1	2266.41	3.10555	0.356852	8.70261	3.24346e-18	6.58391e-16
Rnd1	1072.21	2.1461	0.255845	8.38829	4.93276e-17	8.7293e-15
Ccl2	1338.89	3.4927	0.424231	8.23301	1.8256e-16	2.95305e-14
Serpine1	3465.57	2.1013	0.26023	8.07476	6.76105e-16	1.04468e-13
Tnc	18855.3	2.35908	0.294407	8.013	1.11942e-15	1.66745e-13
Dhrs9	1290.41	2.91858	0.382451	7.63125	2.32484e-14	2.71954e-12
Arhgap30	1521.01	2.28924	0.300157	7.6268	2.40661e-14	2.79937e-12
Csn3	1089.24	3.15909	0.417553	7.56571	3.85741e-14	4.24828e-12
Mmp9	8938.81	2.34816	0.31253	7.51338	5.76188e-14	6.21353e-12
Wt1	8260.76	3.33971	0.459056	7.27516	3.46021e-13	3.34784e-11
Ecm1	7830.79	2.41323	0.33293	7.24845	4.21563e-13	3.94953e-11
Mmp13	10156.4	2.08184	0.292208	7.12454	1.04432e-12	9.24049e-11
Car12	2513.07	3.32401	0.473354	7.02225	2.18325e-12	1.83757e-10
Il34	1717.22	2.0407	0.292257	6.98255	2.89879e-12	2.36297e-10
Grem1	2793.22	3.11325	0.456562	6.8189	9.1738e-12	6.8325e-10
H2-K1	22045.6	2.18511	0.324289	6.73815	1.60413e-11	1.12588e-09
Lgals3	15534.1	2.02283	0.312825	6.46633	1.00414e-10	6.22478e-09
Arg1	2755.92	2.69113	0.43849	6.13726	8.39558e-10	4.35665e-08
Spint2	1646.68	5.4533	0.894186	6.09862	1.06987e-09	5.38969e-08
Slit2	1262.84	2.30981	0.389884	5.92435	3.1354e-09	1.45493e-07
Cgn	1206.28	2.2003	0.387756	5.67444	1.39145e-08	5.50196e-07
Ace	1900.48	2.32101	0.411343	5.64252	1.67581e-08	6.52211e-07
Hist1h4i	1031.69	2.89443	0.553746	5.227	1.72285e-07	5.29253e-06
Gm13230	1092.64	6.12712	1.21455	5.04474	4.5413e-07	1.2537e-05
Lgals7	1102.75	4.62455	0.948524	4.87552	1.08524e-06	2.70722e-05
Cdh3	4403.1	2.5733	0.551371	4.66709	3.05496e-06	6.79408e-05
Igfbp6	1393.06	2.12665	0.472446	4.50137	6.7517e-06	0.000136251
4930461G14Rik	1859.43	5.24452	1.21579	4.31367	1.6057e-05	0.000289096
Mt2	4483.9	2.38516	0.555015	4.29747	1.72758e-05	0.000309157
Chil3	1035.65	3.93495	1.01888	3.86203	0.000112447	0.00156783
Serpinb6b	2379.69	2.00684	0.531406	3.77648	0.000159063	0.00211251
Pappa	2941.54	3.24461	0.959302	3.38226	0.00071892	0.0074389
Gpm6a	3137.34	-2.21108	0.635002	-3.482	0.000497687	0.00547826
Clca3a1	2246.03	-2.49673	0.664721	-3.75606	0.00017261	0.00225194
Ltb	1081.05	-2.20937	0.578865	-3.81674	0.000135229	0.0018324
Meox1	1000.75	-2.42039	0.593132	-4.0807	4.49009e-05	0.000706975
Angpt1	1893.41	-2.11099	0.515264	-4.0969	4.18719e-05	0.000666378
Flnc	5850.73	-2.78671	0.633457	-4.39922	1.08642e-05	0.00020694
A2m	4561.5	-2.66402	0.600801	-4.43412	9.24477e-06	0.000179226
Des	1265.87	-2.33281	0.487904	-4.78128	1.74186e-06	4.12173e-05
Spry1	1626.22	-2.44187	0.492015	-4.963	6.94118e-07	1.82151e-05
Gdf6	3121.01	-2.28163	0.441601	-5.16673	2.38221e-07	7.08673e-06
Atoh8	1562.43	-2.38916	0.425284	-5.6178	1.93405e-08	7.42941e-07
Itih2	1761.2	-3.55443	0.525425	-6.76488	1.33419e-11	9.52567e-10
Fgf1	3144.84	-2.15712	0.303603	-7.10509	1.20248e-12	1.04611e-10
Plvap	7757.18	-2.69792	0.346444	-7.78745	6.83726e-15	8.84785e-13
Cdx2	1275.91	-2.13391	0.214256	-9.95961	2.28966e-23	8.61953e-21
Bmp2	2613.48	-2.29287	0.132649	-17.2853	6.07403e-67	4.19209e-63
Il1rn	30741.3	-2.75957	0.158388	-17.4228	5.53856e-68	5.7338e-64
Upk1b	4052.61	-4.20652	0.20114	-20.9135	4.0391e-97	8.36296e-93
