# Supplementary material for: B7-H3 Suppresses Antitumor Immunity via the CCL2–CCR2–M2 Macrophage Axis and Contributes to Ovarian Cancer Progression
Source: PubMed Central journal article supplement — Cancer Immunol Res. 2021 Nov 19;10(1):56–69. doi: 10.1158/2326-6066.CIR-21-0407 (PMC9414298; doi:10.1158/2326-6066.cir-21-0407), 2021-11-19
Supplement: cir-21-0407_supps7.pdf [file cir-21-0407_supps7.pdf]

**Supplementary Table S7. Univariate and multivariate analyses for progression free survival and overall survival.**

CA125, cancer antigen 125; ULN, upper limit of the normal range; HR, hazard ratio; CI, confidence interval. FIGO stage I, II or III, IV were assigned to the early and advanced groups, respectively. Cases with B7-H3 IHC scores of 0/1 or 2/3 were assigned to the low and high groups, respectively. Cases with CD206+ M2 macrophage numbers < or ≥ the median value were assigned to the sparse and rich groups, respectively. \*Statistical significance.

| Variables                                   | n       |    | Progression free survival |                |                  |                | Overall survival |                |                  |                |
|---------------------------------------------|---------|----|---------------------------|----------------|------------------|----------------|------------------|----------------|------------------|----------------|
|                                             |         |    | Univariate                |                | Multivariate     |                | Univariate       |                | Multivariate     |                |
|                                             |         |    | HR (95% CI)               | <i>P</i> value | HR (95% CI)      | <i>P</i> value | HR (95% CI)      | <i>P</i> value | HR (95% CI)      | <i>P</i> value |
| Age ≥ 65                                    | < 65    | 45 | 1.05 (0.50-2.22)          | 0.89           | 1.16 (0.48-2.78) | 0.75           | 1.19 (0.51-2.75) | 0.69           | 1.36 (0.55-3.37) | 0.50           |
|                                             | ≥ 65    | 17 |                           |                |                  |                |                  |                |                  |                |
| Advanced FIGO stage                         | I, II   | 11 | 5.27 (1.26-22.1)          | 0.02*          | 4.70 (0.83-26.8) | 0.08           | 7.11 (0.96-52.5) | 0.055          | 4.43 (0.50-39.5) | 0.18           |
|                                             | III, IV | 51 |                           |                |                  |                |                  |                |                  |                |
| High level of CA125                         | ≤ ULN   | 7  | 1.67 (0.51-5.49)          | 0.40           | 0.84 (0.20-3.55) | 0.81           | 3.59 (0.49-26.5) | 0.21           | 2.31 (0.27-20.1) | 0.45           |
|                                             | > ULN   | 55 |                           |                |                  |                |                  |                |                  |                |
| Residual tumor at initial debulking surgery | No      | 32 | 2.22 (1.10-4.48)          | 0.03*          | 1.28 (0.58-2.82) | 0.54           | 1.85 (0.84-4.09) | 0.13           | 1.10 (0.46-2.64) | 0.83           |
|                                             | Yes     | 30 |                           |                |                  |                |                  |                |                  |                |
| B7-H3 expression high                       | Low     | 31 | 2.09 (1.04-4.21)          | 0.04*          | 1.97 (0.92-4.23) | 0.08           | 2.42 (1.08-5.44) | 0.03*          | 2.30 (0.99-5.38) | 0.054          |
|                                             | High    | 31 |                           |                |                  |                |                  |                |                  |                |
| M2 macrophage rich                          | Sparse  | 30 | 1.32 (0.67-2.62)          | 0.43           | 1.22 (0.60-2.48) | 0.58           | 1.17 (0.54-2.52) | 0.70           | 1.13 (0.51-2.49) | 0.76           |
|                                             | Rich    | 32 |                           |                |                  |                |                  |                |                  |                |
